# Supplementary material
Source: PubMed Central journal article supplement (PMC5070106)

**Selective role of vinculin in contractile mechanisms of endothelial permeability**

Anna A. Birukova, Alok S. Shah, Yufeng Tian, Grzegorz Gawlak, Nicolene Sarich, and Konstantin G. Birukov

ONLINE DATA SUPPLEMENT

## Supplemental Figure Legend

**Supplemental Figure 1S. Analysis of cell death and EC barrier recovery in IL-6 stimulated endothelial cells.** **A** – HPAEC were stimulated with IL-6 and SR (30 ng/ml / 60 ng/ml, 5 hr) followed by staining with green-fluorescent calcein-AM to indicate intracellular esterase activity and red-fluorescent ethidium homodimer-1 to indicate loss of plasma membrane integrity. Methanol treatment (50% solution, 10 min) was used as a positive cell death control. **A** – HPAEC grown on microelectrodes were stimulated with IL-6 and SR followed by washout of IL-6/SR at the time point shown by arrow. EC permeability changes were monitored by measurements of transendothelial electrical resistance. Shown are results of three independent measurements.

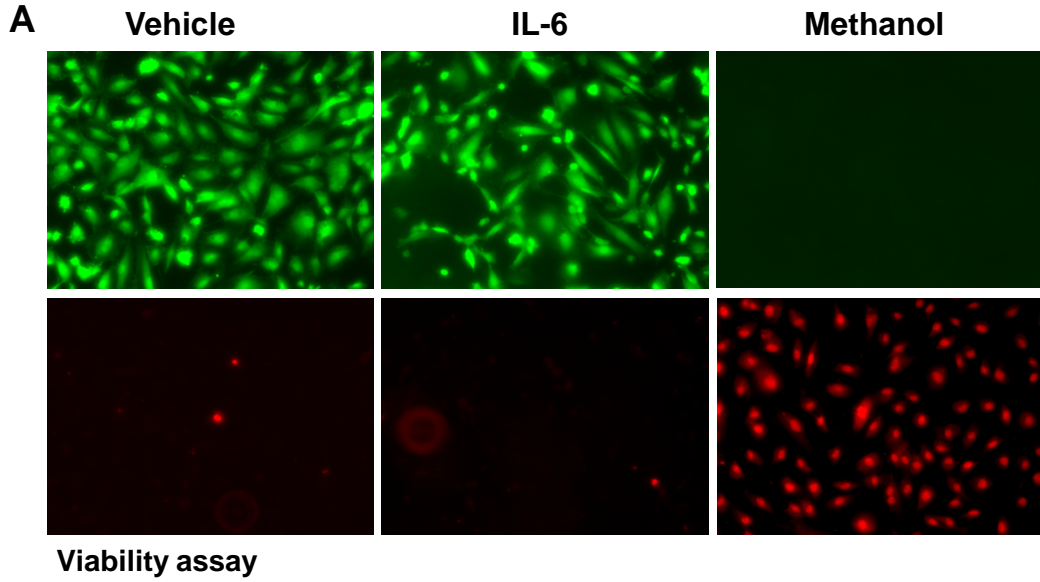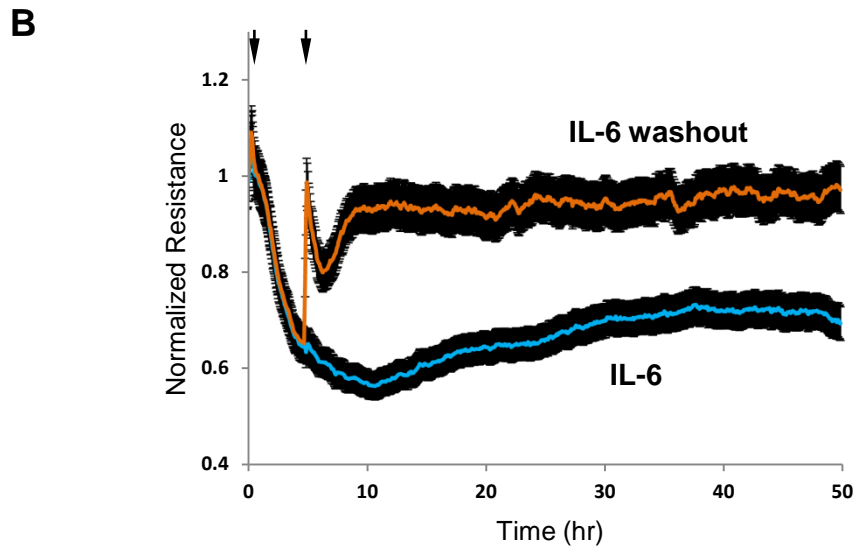

Supplement: 10.1165_rcmb.2015-0328OC_birukova_data_supplement.pdf [file 10.1165_rcmb.2015-0328OC_birukova_data_supplement.pdf]
